# Supplementary material for: Sex-Related Differences in Impact on Safety of Pharmacogenetic Profile for Colon Cancer Patients Treated with FOLFOX-4 or XELOX Adjuvant Chemotherapy
Source: PubMed Central journal article supplement (PMC6687727; doi:10.1038/s41598-019-47627-1), 2019-08-08
Supplement: 41598_2019_47627_MOESM1_ESM.pdf [file 41598_2019_47627_MOESM1_ESM.pdf]

# **Sex-Related Differences in Impact On Safety Of Pharmacogenetic Profile For Colon Cancer Patients Treated With FOLFOX-4 or XELOX Adjuvant Chemotherapy**

<sup>1</sup>Annamaria Ruzzo<sup>§\*</sup>, <sup>2</sup>Francesco Graziano<sup>§</sup>, <sup>3</sup>Francesca Galli, <sup>3</sup>Fabio Galli, <sup>3</sup>Eliana Rulli, <sup>4</sup>Sara Lonardi, <sup>5</sup>Monica Ronzoni, <sup>6</sup>Bruno Massidda, <sup>4</sup>Vittorina Zagonel, <sup>7</sup>Nicoletta Pella, <sup>8</sup>Claudia Mucciarini, <sup>9</sup>Roberto Labianca, <sup>6</sup>Maria Teresa Ionta, <sup>1</sup>Irene Bagaloni, <sup>10</sup>Enzo Veltri, <sup>11</sup>Pietro Sozzi, <sup>12</sup>Sandro Barni, <sup>5</sup>Vincenzo Ricci, <sup>13</sup>Luisa Foltran, <sup>14</sup>Mario Nicolini, <sup>15</sup>Edoardo Biondi, <sup>16</sup>Annalisa Bramati, <sup>17</sup>Daniele Turci, <sup>18</sup>Silvia Lazzarelli, <sup>19</sup>Claudio Verusio, <sup>4</sup>Francesca Bergamo, <sup>20</sup>Alberto Sobrero, <sup>21</sup>Luciano Frontini, <sup>1</sup>Mauro Magnani.

<sup>1</sup>Department of Biomolecular Sciences, Università degli Studi di Urbino "Carlo Bo", Urbino, Italy. <sup>2</sup>Azienda Ospedaliera "Ospedali Riuniti Marche Nord", Pesaro, Italy. <sup>3</sup>Laboratory of Methodology for Clinical research, Department of Oncology, Istituto di Ricerche Farmacologiche Mario Negri IRCCS, Milano, Italy. <sup>4</sup>IOV- IRCCS, Padova, Italy. <sup>5</sup>Ospedale San Raffaele, Milano, Italy. <sup>6</sup>Azienda Ospedaliera Universitaria di Cagliari, P.O. Monserrato, Italy. <sup>7</sup>Azienda Ospedaliera S. Maria della Misericordia, Udine, Italy. <sup>8</sup>Ospedale "B. Ramazzini", Carpi, Italy. <sup>9</sup>Ospedale Papa Giovanni XXIII, Bergamo, Italy. <sup>10</sup>Ospedale di Gaeta ASL Latina, Italy. <sup>11</sup>Ospedale degli Infermi di Biella. <sup>12</sup>Ospedale "Treviglio-Caravaggio", Treviglio, Italy. <sup>13</sup>Azienda Ospedaliera Santa Maria degli Angeli, Pordenone, Italy. <sup>14</sup>Azienda Ospedaliera Ospedale "Cervesi", Cattolica, Italy. <sup>15</sup>Ospedale "F. Renzetti", Lanciano, Italy. <sup>16</sup>Azienda Ospedaliera Fatebenefratelli, Milano, Italy. <sup>17</sup>AUSL Ospedale di Ravenna, Ravenna, Italy. <sup>18</sup>Azienda Ospedaliera di Cremona, Cremona, Italy. <sup>19</sup>Ospedale di Saronno, Saronno, Italy. <sup>20</sup>Azienda Ospedaliera "Ospedale San Martino", Genova, Italy. <sup>21</sup>Fondazione GISCAD, Parabiago, Italy.

<sup>§</sup>A. Ruzzo and F. Graziano contributed equally to the study

\*Annamaria Ruzzo, Department of Biomolecular Sciences (DiSB)  
University of Urbino "Carlo Bo", Via Arco d'Augusto, 2 Italy 61032-FANO (PU)  
Tel: +390722304957 \*e-mail: annamaria.ruzzo@uniurb.it

## Supplementary Tables and Figure

**Table S1. Demographic and clinical characteristics. Comparison between the TOSCA trial and the ancillary study samples.**

|                                          | Ancillary study N=512 | TOSCA trial N=3654 | P-value |
|------------------------------------------|-----------------------|--------------------|---------|
| <b>Age</b>                               |                       |                    | 0.9838  |
| Mean (SD)                                | 63.3 (9.5)            | 63.3 (9.7)         |         |
| Median (Q1 - Q3)                         | 64.0 (57.4-70.7)      | 64.5 (57.3-70.6)   |         |
| Min - Max                                | 25.1 - 82.3           | 21.0 - 83.8        |         |
| <b>Sex</b>                               |                       |                    | 0.4534  |
| Maschio                                  | 294 (57.4)            | 2034 (55.7)        |         |
| Femmina                                  | 218 (42.6)            | 1620 (44.3)        |         |
| Missing                                  | 0                     | 3654               |         |
| <b>ECOG Performance status - n (%)</b>   |                       |                    | 0.1051* |
| 0                                        | 494 (96.5)            | 3461 (94.8)        |         |
| 1                                        | 18 (3.5)              | 189 (5.2)          |         |
| 2                                        | 0 (0.0)               | 1 (0.0)            |         |
| Missing                                  | 0                     | 3                  |         |
| <b>Tumor site</b>                        |                       |                    | 0.0323  |
| Single site                              | 489 (95.5)            | 3541 (97.2)        |         |
| Multiple site                            | 23 (4.5)              | 101 (2.8)          |         |
| Missing                                  | 0                     | 12                 |         |
| <b>Single site specification - n (%)</b> |                       |                    | 0.5615  |
| Ascending colon                          | 138 (28.2)            | 1106 (31.3)        |         |
| Hepatic flexure                          | 27 (5.5)              | 150 (4.2)          |         |
| Trasverse colon                          | 32 (6.5)              | 240 (6.8)          |         |
| Splenic flexure                          | 24 (4.9)              | 134 (3.8)          |         |
| Descending colon                         | 73 (14.9)             | 556 (15.7)         |         |
| Sigmoid colon                            | 131 (26.8)            | 895 (25.3)         |         |
| Sigmoid-rectum colon                     | 64 (13.1)             | 455 (12.9)         |         |
| Missing                                  | 23                    | 118                |         |
| <b>Tumor site - n (%)</b>                |                       |                    | 0.3008  |
| Right sides                              | 198 (38.7)            | 1501 (41.3)        |         |
| Left sides                               | 293 (57.2)            | 2024 (55.7)        |         |
| Multiple site                            | 21 (4.1)              | 112 (3.1)          |         |
| Missing                                  | 0                     | 17                 |         |

\*Comparison was performed excluding patients with performance status equal to 2.

**Table S2. Tumor characteristics. Comparison between the TOSCA trial and the ancillary study samples.**

|                                           | Ancillary study N=512 | TOSCA trial N=3654 | P-value |
|-------------------------------------------|-----------------------|--------------------|---------|
| <b>Histology - n (%)</b>                  |                       |                    | 0.4270  |
| Adenocarcinoma                            | 441 (86.1)            | 3217 (88.2)        |         |
| Adenocarcinoma mucoide                    | 65 (12.7)             | 398 (10.9)         |         |
| Carcinoma a cellule ad anello con castone | 3 (0.6)               | 16 (0.4)           |         |
| Altro                                     | 1 (0.2)               | 7 (0.2)            |         |
| Carcinoma midollare                       | 2 (0.4)               | 3 (0.1)            |         |
| Carcinoma adenosquamoso                   | 0 (0.0)               | 4 (0.1)            |         |
| Carcinoma a cellule squamose              | 0 (0.0)               | 1 (0.0)            |         |
| Missing                                   | 0                     | 8                  |         |
| <b>Histology categorization - n (%)</b>   |                       |                    | 0.3636  |
| Adenocarcinoma                            | 441 (86.1)            | 3217 (88.2)        |         |
| Adenocarcinoma mucoide                    | 65 (12.7)             | 398 (10.9)         |         |
| Altro                                     | 6 (1.2)               | 31 (0.9)           |         |
| Missing                                   | 0                     | 8                  |         |
| <b>T stage - n (%)</b>                    |                       |                    | 0.4702  |
| Tx                                        | 1 (0.2)               | 12 (0.3)           |         |
| T0                                        | 0 (0.0)               | 2 (0.1)            |         |
| T1                                        | 12 (2.3)              | 76 (2.1)           |         |
| T2a                                       | 15 (2.9)              | 169 (4.6)          |         |
| T2b                                       | 16 (3.1)              | 78 (2.1)           |         |
| T3                                        | 385 (75.2)            | 2710 (74.5)        |         |
| T4                                        | 83 (16.2)             | 590 (16.2)         |         |
| Missing                                   | 0                     | 17                 |         |
| <b>N stage - n (%)</b>                    |                       |                    | 0.4740  |
| Nx                                        | 0 (0.0)               | 11 (0.3)           |         |
| N0                                        | 185 (36.1)            | 1232 (34.0)        |         |
| N1                                        | 237 (46.3)            | 1748 (48.2)        |         |
| N2                                        | 90 (17.6)             | 637 (17.6)         |         |
| Missing                                   | 0                     | 26                 |         |
| <b>Clinical stage - n (%)</b>             |                       |                    | 0.4777  |
| II                                        | 185 (36.1)            | 1262 (34.5)        |         |
| III                                       | 327 (63.9)            | 2392 (65.5)        |         |
| <b>Clinical stage subgrups - n (%)</b>    |                       |                    | 0.7865  |
| II                                        | 185 (36.1)            | 1262 (34.7)        |         |
| III low risk                              | 212 (41.4)            | 1558 (42.9)        |         |
| III high risk                             | 115 (22.5)            | 815 (22.4)         |         |
| Missing                                   | 0                     | 19                 |         |

|                                                          | Ancillary study N=512 | TOSCA trial N=3654 | P-value |
|----------------------------------------------------------|-----------------------|--------------------|---------|
| <b>Grade - n (%)</b>                                     |                       |                    | 0.3210  |
| GX: non valutabile                                       | 4 (0.8)               | 19 (0.5)           |         |
| G1: ben differenziato                                    | 38 (7.5)              | 211 (5.9)          |         |
| G2: mediamente differenziato                             | 307 (60.6)            | 2295 (63.8)        |         |
| G3: scarsamente differenziato                            | 158 (31.2)            | 1072 (29.8)        |         |
| Missing                                                  | 5                     | 57                 |         |
| <b>Chemotherapy taken during the TOSCA trial - n (%)</b> |                       |                    | 0.0010  |
| Folfox-4 (6 months)                                      | 186 (36.3)            | 1195 (32.7)        |         |
| Xelox (24 weeks)                                         | 71 (13.9)             | 686 (18.8)         |         |
| Folfox-4 (3 months)                                      | 187 (36.5)            | 1139 (31.2)        |         |
| Xelox (12 weeks)                                         | 68 (13.3)             | 634 (17.4)         |         |

**Note.** In TOSCA trial, treatment with Xelox was allowed when the recruitment in this ancillary study was almost concluded. No difference was detected in treatment duration (3 or 6 months) between the TOSCA and ancillary samples (p=0.5866).

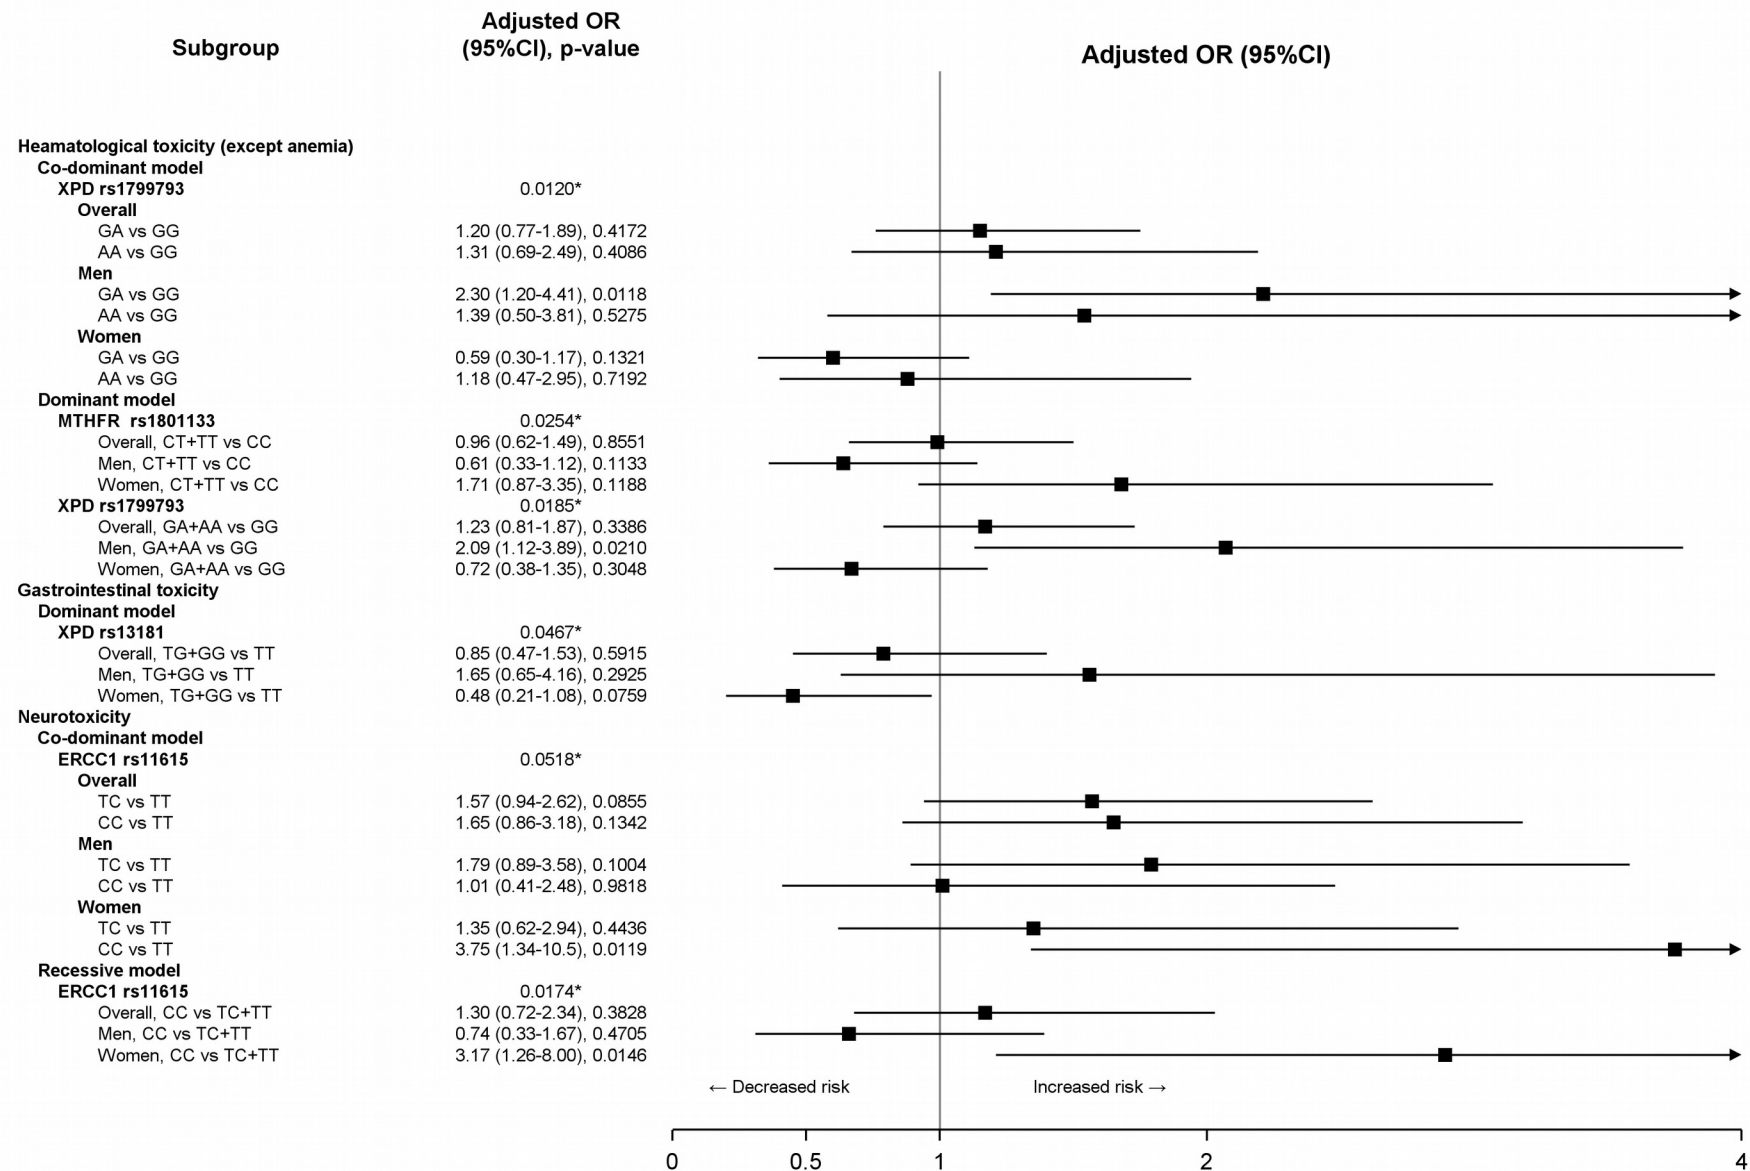

\* P-value of interaction

Figure S1 – Logistic regression for time to haematological toxicity (TTH), time to gastrointestinal toxicity (TTG) and time to neurotoxicity (TTN)
