# Supplementary material for: Sex-Related Differences in Impact on Safety of Pharmacogenetic Profile for Colon Cancer Patients Treated with FOLFOX-4 or XELOX Adjuvant Chemotherapy
Source: PubMed Central journal article supplement (PMC6687727; doi:10.1038/s41598-019-47627-1), 2019-08-08
Supplement: 41598_2019_47627_MOESM2_ESM.pdf [file 41598_2019_47627_MOESM2_ESM.pdf]

# Sex-Related Differences in Impact On Safety Of Pharmacogenetic Profile For Colon Cancer Patients Treated With FOLFOX-4 or XELOX Adjuvant Chemotherapy

<sup>1</sup>Annamaria Ruzzo<sup>§\*</sup>, <sup>2</sup>Francesco Graziano<sup>§</sup>, <sup>3</sup>Francesca Galli, <sup>3</sup>Fabio Galli, <sup>3</sup>Eliana Rulli, <sup>4</sup>Sara Lonardi, <sup>5</sup>Monica Ronzoni, <sup>6</sup>Bruno Massidda, <sup>4</sup>Vittorina Zagonel, <sup>7</sup>Nicoletta Pella, <sup>8</sup>Claudia Mucciarini, <sup>9</sup>Roberto Labianca, <sup>6</sup>Maria Teresa Ionta, <sup>1</sup>Irene Bagaloni, <sup>10</sup>Enzo Veltri, <sup>11</sup>Pietro Sozzi, <sup>12</sup>Sandro Barni, <sup>5</sup>Vincenzo Ricci, <sup>13</sup>Luisa Foltran, <sup>14</sup>Mario Nicolini, <sup>15</sup>Edoardo Biondi, <sup>16</sup>Annalisa Bramati, <sup>17</sup>Daniele Turci, <sup>18</sup>Silvia Lazzarelli, <sup>19</sup>Claudio Verusio, <sup>4</sup>Francesca Bergamo, <sup>20</sup>Alberto Sobrero, <sup>21</sup>Luciano Frontini, <sup>1</sup>Mauro Magnani.

<sup>1</sup>Department of Biomolecular Sciences, Università degli Studi di Urbino "Carlo Bo", Urbino, Italy. <sup>2</sup>Azienda Ospedaliera "Ospedali Riuniti Marche Nord", Pesaro, Italy. <sup>3</sup>Laboratory of Methodology for Clinical research, Department of Oncology, Istituto di Ricerche Farmacologiche Mario Negri IRCCS, Milano, Italy. <sup>4</sup>IOV- IRCCS, Padova, Italy. <sup>5</sup>Ospedale San Raffaele, Milano, Italy. <sup>6</sup>Azienda Ospedaliera Universitaria di Cagliari, P.O. Monserrato, Italy. <sup>7</sup>Azienda Ospedaliera S. Maria della Misericordia, Udine, Italy. <sup>8</sup>Ospedale "B. Ramazzini", Carpi, Italy. <sup>9</sup>Ospedale Papa Giovanni XXIII, Bergamo, Italy. <sup>10</sup>Ospedale di Gaeta ASL Latina, Italy. <sup>11</sup>Ospedale degli Infermi di Biella. <sup>12</sup>Ospedale "Treviglio-Caravaggio", Treviglio, Italy. <sup>13</sup>Azienda Ospedaliera Santa Maria degli Angeli, Pordenone, Italy. <sup>14</sup>Azienda Ospedaliera Ospedale "Cervesi", Cattolica, Italy. <sup>15</sup>Ospedale "F. Renzetti", Lanciano, Italy. <sup>16</sup>Azienda Ospedaliera Fatebenefratelli, Milano, Italy. <sup>17</sup>AUSL Ospedale di Ravenna, Ravenna, Italy. <sup>18</sup>Azienda Ospedaliera di Cremona, Cremona, Italy. <sup>19</sup>Ospedale di Saronno, Saronno, Italy. <sup>20</sup>Azienda Ospedaliera "Ospedale San Martino", Genova, Italy. <sup>21</sup>Fondazione GISCAD, Parabiago, Italy.

<sup>§</sup>A. Ruzzo and F. Graziano contributed equally to the study

\*Annamaria Ruzzo, Department of Biomolecular Sciences (DiSB)  
University of Urbino "Carlo Bo", Via Arco d'Augusto, 2 Italy 61032-FANO (PU)  
Tel: +390722304957 \*e-mail: [annamaria.ruzzo@uniurb.it](mailto:annamaria.ruzzo@uniurb.it)

Supplementary information: list of local Ethics Committee

1. A.O.U San Martino, Genova - Medicina Interna ad indirizzo Oncologico
2. A.O. Ospedale degli Infermi di Rimini, Oncologia ed Oncoematologia
3. A.O.U. San Martino, Genova - Oncologia Medica
4. Fondazione Poliambulanza, Brescia – Oncologia Medica
5. Ospedale Civile, Latisana - Oncologia Medica
6. A.O. S. Maria della Gruccia, Montevarchi - Oncologia Medica
7. A.O. della Valtellina e Valchiavenna, Sondrio - Oncologia Medica
8. Presidio Sanitario Gradenigo, Torino - Oncologia Medica
9. A.O. Umberto I, Nocera Inferiore – Oncoematologia
10. AUSL 4 Prato, Prato - Oncologia Medica
11. A.O. S.Camillo Forlanini - Roma - Oncologia Medica
12. A.O. Santa Maria Annunziata, Antella - Oncologia Medica
13. AUSL di Ravenna, Faenza - Oncologia Medica
14. Centro di Riferimento Oncologico Basilicata. Rionero in Vulture – Onco-ematologia
15. A.O. Alessandro Manzoni, Lecco - Oncologia Medica
16. Ospedale Civile, Sassari - Oncologia Medica
17. Ospedale Civile Renzetti, Lanciano - Oncologia Medica
18. Istituto Clinico Humanitas, Rozzano - Oncologia Medica ed Ematologia
19. A.O. Santa Chiara APSS, Trento - Oncologia Medica
20. A.O. Sant'Orsola-Fatebenefratelli, Brescia – Oncologia Medica
21. A.O. G. Rummo, Benevento – Oncologia
22. Policlinico Universitario di Cagliari - Oncologia Medica II

23. A.O.U. Vittorio Emanuele, Catania - Oncologia Medica
24. A.O. Carlo Poma, Mantova - Oncologia Medica
25. Ospedale Belcolle, Viterbo - Oncologia Medica
26. Ospedale Centrale, Bolzano - Oncologia Medica
27. A.O. Ospedale di Circolo di Busto Arsizio, Saronno - Oncologia Medica
28. Arcispedale Santa Maria Nuova, Reggio Emilia - Oncologia Medica
29. A.O. S.Salvatore, L'Aquila - Medicina Sperimentale
30. A.O. S. Croce e Carle, Cuneo - Oncologia Medica
31. AUSL di Ravenna, Ravenna - Oncologia Medica
32. A.O. San Paolo, Milano - Oncologia Medica
33. A.O. Morgagni -Pierantoni, Meldola – Oncologia
34. Ospedale Versilia, Lido di Camaiore - Oncologia Medica
35. A.O. S.Carlo , Potenza - Oncologia Medica
36. A.O. San Giovanni Calibita Fatebenefratelli, Roma - Oncologia Medica
37. A.O. San Massimo, Penne – Oncologia
38. A.O. Ospedale Luigi Sacco, Milano - Oncologia Medica
39. Policlinico di Monza - Oncologia Medica
40. Policlinico Umberto I, Roma - Oncologia B
41. A.O. Cervesi, Cattolica - Oncologia Medica
42. ASL Latina, P.O. Gaeta - Oncologia Medica
43. Multimedita S. Maria, Castellanza - Oncologia Medica
44. Ospedale Civile, Lamezia Terme - Oncologia Medica
45. A.O. San Raffaele, Milano - Oncologia Medica
46. IRCCS Casa Sollievo della Sofferenza, S. Giovanni Rotondo – Oncologia
47. A.O. B.Ramazzini, Carpi - U.O. Medicina Oncologica
48. AUSL 6, P.O. di Livorno - Oncologia Medica
49. A.O.Santa Maria della Misericordia, Rovigo - Oncologia Medica
50. P.O. Terracina - Oncologia Medica
51. A.O. Careggi, Firenze - U.O. Oncologia Medica
52. A.O.U. di Parma, Parma – Oncologia Medica
53. Ospedale Civile, Asti - Oncologia Medica
54. A.O. Fatebenefratelli e Oftalmico, Milano – Oncologia
55. A.O.Cardarelli, Napoli – Oncologia
56. A.O. Umberto I, Altamura – Oncologia Medica
57. Casa di Cura IGEA, Milano - Oncologia Medica
58. Istituto Clinico S. Anna, Brescia - Oncologia Medica
59. AUSL di Ravenna, Lugo - Oncologia Medica
60. Policlinico Universitario di Cagliari - Oncologia Medica I
61. A.O. Spedali Civili di Brescia - Oncologia Medica
62. Ospedale di Manerbio, Manerbio - D.H. Oncologico
63. Istituto Oncologico G.Paolo II, Bari - Oncologia Medica e Sperimentale
64. A.O.U. Campus bio-medico, Roma - Oncologia Medica
65. A.O. della Valtellina e Valchiavenna, Sondalo - Day Hospital
66. A.O. Mellini di Chiari, Iseo - Oncologia Medica
67. A.O. Ospedale di Circolo e Fondazione Macchi - Oncologia Medica
68. A.O. San Giovanni Battista, Torino - Oncologia Medica 1
69. Fondazione San Raffaele - G. Giglio, Cefalu' - Oncologia Medica
70. Fondazione Maugeri, Pavia - Oncologia Medica I
71. A.O.Mazzoni, Ascoli Piceno - Oncologia Medica
72. A.O. Ospedale di Circolo di Melegnano, Gorgonzola - Oncologia Medica
73. Ospedale Civile A. Murri, Fermo - Oncologia Medica
74. A.O. G. da Saliceto, Piacenza - Oncologia Medica
75. A.O. S.Paolo, Savona - Oncologia Medica
76. Ospedale Civile Santo Spirito, Pescara - Oncologia Medica
77. Ospedale Civile, Legnano - Oncologia Medica
78. Fondazione Istituto Nazionale dei Tumori, Milano - Oncologia Medica
79. A.O. Valduce, Como – Oncoematologia
80. A.O. S. Camillo De Lellis, Rieti – Oncologia
81. Istituto Europeo di Oncologia, Milano - Dipartimento di Medicina
82. P.O. Bufalini, Cesena - Oncologia Medica
83. A.O. S.Giovanni Battista, Torino - Oncologia Medica 2
84. A.O. Bianchi-Melacrino-Morelli, Reggio Calabria - Oncologia Medica
85. Fondazione PTV Policlinico Tor Vergata, Roma - Oncologia Medica

86. Policlinico Umberto I - Roma - Oncologia C
87. Istituto per la Ricerca e la Cura del Cancro, Candiolo - Oncologia Medica ed Ematologia
88. Ospedale Sacro Cuore Don Calabria, Negrar - Oncologia Medica
89. AUSL 1 di Massa e Carrara, Carrara - Oncologia Medica
90. A.O. Ospedali Galliera, Genova - Oncologia Medica
91. A.O. Ospedale San Carlo Borromeo, Milano - Oncologia
92. A.O. Canosa di Puglia, Canosa - Medicina Interna e DH Oncologico
93. Policlinico Gianbattista Rossi, Verona - Oncologia Medica
94. A.O. Ospedale di Arezzo, Arezzo - Oncologia Medica
95. A.O. S. Anna, Como - Oncologia Medica
96. A.O. S. Maria della Misericordia, Udine - D.I.A.S.O
97. Multimedita IRCCS, S.S. Giovanni - Oncologia Medica
98. A.O. Ospedale Maggiore della Carità, Novara - Oncologia
99. A.O. San Gerardo, Monza - Oncologia Medica
100. A.O. S. Salvatore, Pesaro - Divisione Oncologia
101. A.O. Sant' Andrea, Roma - Oncologia Medica
102. IDI IRCCS, Roma - Oncologia Medica IV Divisione
103. Ospedale degli Infermi, Biella - Oncologia Medica
104. P.O. S. Giovanni Bosco, Torino - Oncologia Medica
105. ASL 18 - P.O. San Lazzaro, Alba - Oncologia Medica
106. A.O. della provincia di Lodi, Casalpusterlengo - Oncologia Medica
107. A.O. Ospedali Riuniti di Bergamo - Oncologia Medica
108. A.O. Univ. Careggi, Firenze - Oncologia Medica
109. A.O. Santa Croce, Fano - Oncologia Medica
110. Istituti Ospitalieri di Cremona - Medicina e Oncologia Medica
111. A.O. E. Profili, Fabriano - U.O. Oncologia Medica
112. A.O.U. Federico II, Napoli - Dip. di Endocrinologia ed Oncologia Molecolare e Clinica
113. A.O. Ospedale Ca' Granda, Milano - Oncologia Medica
114. A.O. S. Maria degli Angeli, Pordenone - Oncologia Medica
115. A.O. Ospedale Treviglio-Caravaggio, Treviglio - Oncologia Medica
116. A.O.U. Ospedali Riuniti, Foggia - Oncologia Medica
117. A.O. A. Perrino, Brindisi - Oncologia Medica
118. AUSL 7, Siena - Oncologia Medica
119. Centro di Riferimento Oncologico, Aviano - Oncologia Medica B
120. A.O.U. Policlinico Paolo Giaccone, Palermo - Oncologia Medica
121. Istituto Nazionale per la ricerca sul cancro, Genova - Oncologia Medica A
122. A.O. Evangelico Valdese, Torino - Oncologia Medica
123. ASL 1 Umbria, Città di Castello - Oncologia Medica
124. A.O. Ospedali Riuniti Umberto I, Ancona - Divisione Clinica di Oncologia Medica
125. A.O. Univ. Policlinico Martino - Oncologia Medica
126. Fondazione G. Pascale, Napoli - Oncologia Medica A
127. Fondazione G. Pascale, Napoli - Oncologia Medica B
128. A.O. D. Cotugno, Napoli - Oncologia Medica
129. IRCCS Istituto Oncologico Veneto, Padova - Oncologia Medica 1
130. Casa di Cura La Maddalena, Palermo - Oncologia Medica
